# Supplementary material for: Molecular ruby: exploring the excited state landscape
Source: Royal Society of Chemistry journal article supplement (doi:10.1039/d2dt00569g), 2022-01-01
Supplement: d2dt00569g1.pdf [file d2dt00569g1.pdf]

## Molecular Ruby: Exploring the Excited State Landscape

Winald Robert Kitzmann,<sup>a</sup> Charusheela Ramanan,<sup>b</sup> Robert Naumann<sup>a</sup> and Katja Heinze\*<sup>a</sup>

<sup>a</sup> Department of Chemistry, Johannes Gutenberg University of Mainz, Mainz, Germany. E-mail: [katja.heinze@uni-mainz.de](mailto:katja.heinze@uni-mainz.de)

<sup>b</sup> Department of Physics and Astronomy, Vrije Universiteit Amsterdam, Amsterdam, Netherlands.

<sup>c</sup> Max-Planck-Institute for Polymer Research, Mainz, Germany.

## Supporting Information

## Experimental Details

Absorption spectra were recorded using a JASCO V770 spectrometer. Emission and excitation spectra were recorded using an FLS1000 (Edinburgh Instruments) spectrofluorometer with a xenon lamp (Xe2) as excitation source and the photomultipliers N-G11 PMT-980 (250–980 nm) as well as the liquid nitrogen cooled Hamamatsu N-G09 PMT-1700 (500–1700 nm) were used for detection. The absolute fluorescence quantum yield of  $[\text{Cr}(\text{ddpd})_2]^{3+}$  was determined using the FLS1000 spectrofluorometer and an integrating sphere setup. Deconvolution of the absorption and emission spectra was performed using the software OriginPro 9.0.

Fs-Transient absorption spectra were measured using a Helios-Fire pump-probe setup (Ultrafast Systems) paired with a regeneratively amplified 1030 nm laser (Pharos, Light Conversion, 1030 nm, 200 fs, 200  $\mu\text{J}$ ). The effective laser repetition rate of 1 kHz was set via an internal pulse picker. A small portion of the 1030 nm fundamental is directed to the optical delay line and is subsequently used to generate broadband probe light by focusing onto a sapphire (visible range) or YAG (NIR range) crystal. The pump pulse is generated with an optical parametric amplifier (Orpheus-F, Light Conversion). The pump fluence at the sample was 1  $\mu\text{J}/\text{pulse}$ . Samples were measured in 1 mm path length cuvettes, with an OD of 0.4 at 500 nm. Global analysis of the TA data was done using the R-package TIMP software with the graphical interface Glotaran 1.5.1.<sup>1</sup>

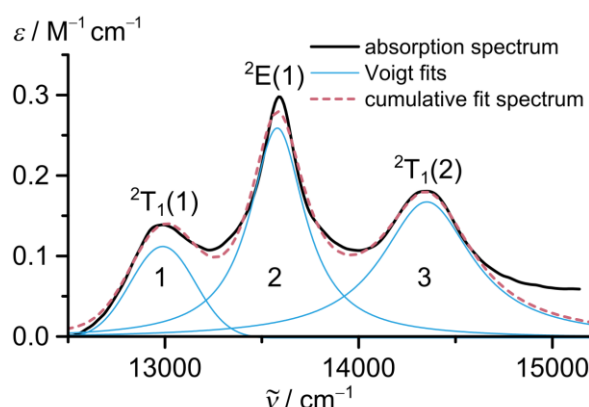

Figure S1: Experimental absorption spectrum of  $[\text{Cr}(\text{ddpd})_2]^{3+}$  in  $\text{CD}_3\text{CN}$  (120 mM) in the region of the spin-forbidden  ${}^4\text{A}_2 \rightarrow {}^2\text{T}_1/{}^2\text{E}$  transitions with Voigt fits.

Table S1: Parameters of the Voigt fits of the absorption spectrum of  $[\text{Cr}(\text{ddpd})_2]^{3+}$  in  $\text{CD}_3\text{CN}$  (120 mM) in the region of the spin-forbidden  ${}^4\text{A}_2 \rightarrow {}^2\text{T}_1/{}^2\text{E}$  absorptions. The assignment is based on CASSCF(7,12)-FIC-NEVPT2 calculations.<sup>2</sup>

| Fit | Peak position / $\text{cm}^{-1}$ (in nm) | $\epsilon_{\text{max}} / \text{M}^{-1} \text{cm}^{-1}$ | FWHM / $\text{cm}^{-1}$ | Norm. area | Assignment                                     |
|-----|------------------------------------------|--------------------------------------------------------|-------------------------|------------|------------------------------------------------|
| 1   | 12989 (770)                              | 0.11                                                   | 395                     | 1.00       | ${}^4\text{A}_2 \rightarrow {}^2\text{T}_1(1)$ |
| 2   | 13580 (736)                              | 0.26                                                   | 346                     | 2.96       | ${}^4\text{A}_2 \rightarrow {}^2\text{E}(1)$   |
| 3   | 14352 (697)                              | 0.17                                                   | 572                     | 3.17       | ${}^4\text{A}_2 \rightarrow {}^2\text{T}_1(2)$ |

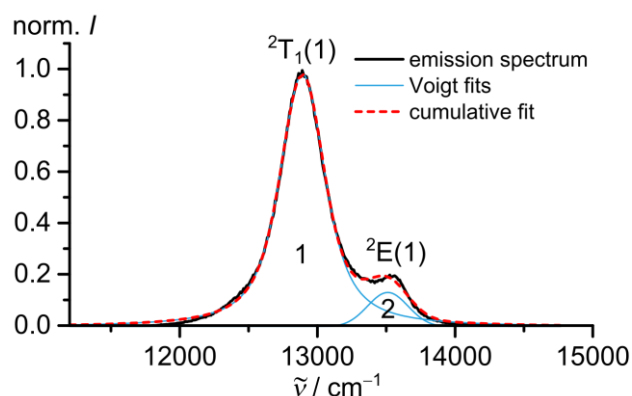

Figure S2: Phosphorescence spectrum of  $[\text{Cr}(\text{ddpd})_2]^{3+}$  in acetonitrile at 293 K fitted with two Voigt functions.

Table S2: Parameters of the Voigt fits of the phosphorescence spectrum of  $[\text{Cr}(\text{ddpd})_2]^{3+}$  in acetonitrile at 293 K. The assignment is based on CASSCF(7,12)-FIC-NEVPT2 calculations.<sup>2</sup>

| Fit | Peak position / $\text{cm}^{-1}$ (in nm) | FWHM / $\text{cm}^{-1}$ | Norm. area |                                                |
|-----|------------------------------------------|-------------------------|------------|------------------------------------------------|
| 1   | 12889 (776)                              | 392                     | 1.00       | ${}^2\text{T}_1(1) \rightarrow {}^4\text{A}_2$ |
| 2   | 13509 (740)                              | 345                     | 0.091      | ${}^2\text{E}(1) \rightarrow {}^4\text{A}_2$   |

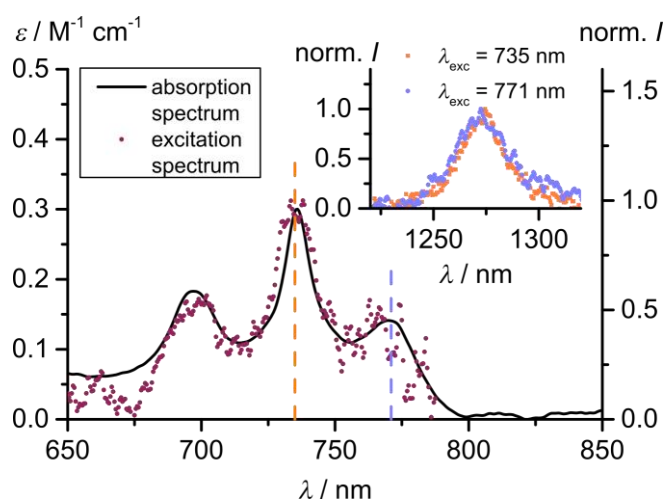

Figure S3: Absorption and excitation spectrum ( $\lambda_{\text{em}} = 1274 \text{ nm}$ ) of  $[\text{Cr}(\text{ddpd})_2]^{3+}$  in aerated  $\text{CD}_3\text{CN}$  (120 mM) in the region of spin-forbidden  ${}^4\text{A}_2 \rightarrow {}^2\text{T}_1/{}^2\text{E}$  transitions. Inset:  ${}^1\text{O}_2$  phosphorescence spectra sensitized by  $[\text{Cr}(\text{ddpd})_2]^{3+}$  with excitation at 735 and 771 nm, respectively.

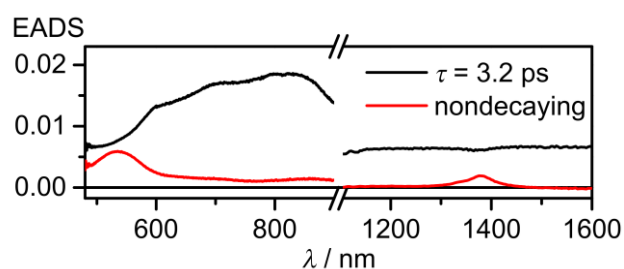

Figure S4: Evolution-associated difference spectrum (EADS) obtained from fs-transient absorption data of  $[\text{Cr}(\text{ddpd})_2]^{3+}$  in  $\text{CH}_3\text{CN}$  ( $\lambda_{\text{exc}} = 435 \text{ nm}$ ).

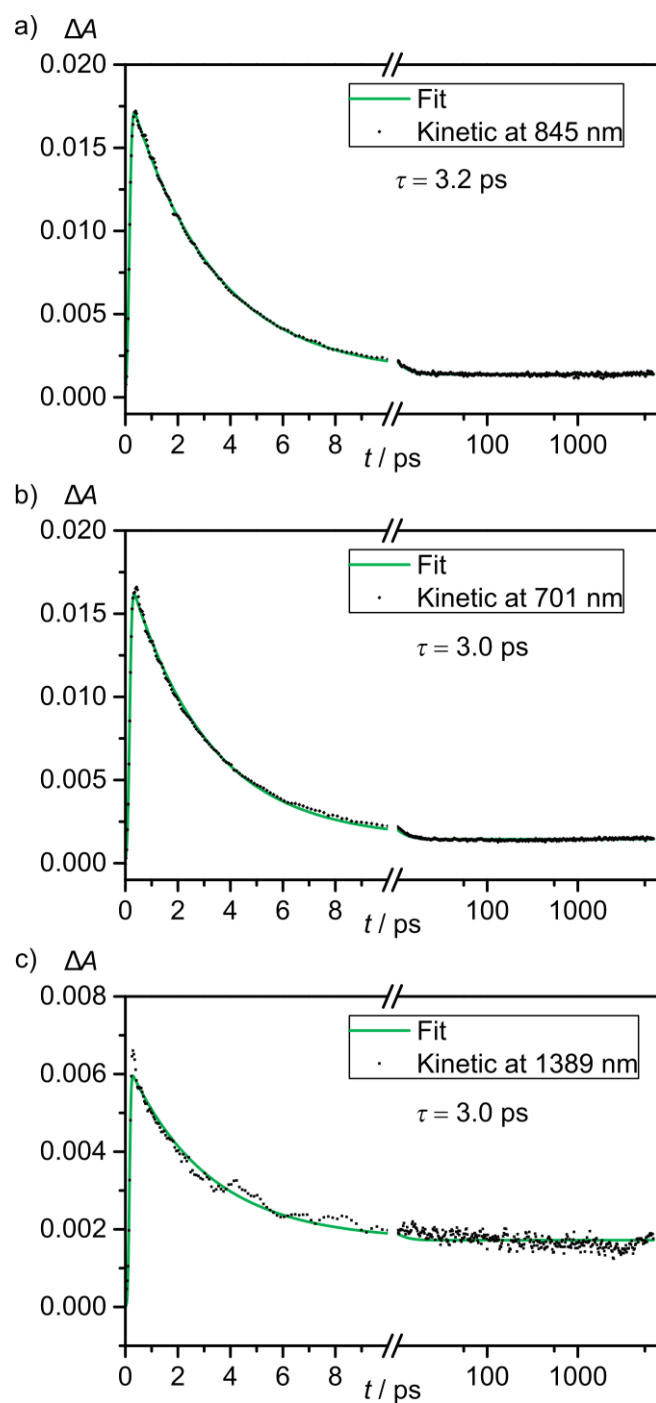

Figure S5: Decay traces of the TA signal of  $[\text{Cr}(\text{ddpd})_2]^{3+}$  ( $\lambda_{\text{exc}} = 435$  nm) in  $\text{CH}_3\text{CN}$  with monoexponential fits.

## References

- 1 J. J. Snellenburg, S. P. Laptinok, R. Seger, K. M. Mullen and I. H. M. van Stokkum, *J. Stat. Soft.*, 2012, **49**.
- 2 S. Otto, J. P. Harris, K. Heinze and C. Reber, *Angew. Chem. Int. Ed.*, 2018, **57**, 11069–11073.
